# Supplementary material for: Factors Influencing the Therapeutic Efficacy of the PSMA Targeting Radioligand 212Pb-NG001
Source: MDPI journal article supplement (doi:10.3390/cancers14112784), 2022-06-03
Supplement: s1 [file s1]

# Factors Influencing the Therapeutic Efficacy of the PSMA Targeting Radioligand $^{212}\text{Pb}$ -NG001

Vilde Yuli Stenberg <sup>1,2,3,\*</sup>, Anna Julie Kjøl Tornes <sup>1,2,3,†</sup>, Hogne Røed Nilsen <sup>4</sup>, Mona-Elisabeth Revheim <sup>3,5</sup>, Øyvind Sverre Bruland <sup>3,6</sup>, Roy Hartvig Larsen <sup>2</sup> and Asta Juzeniene <sup>1</sup>

<sup>1</sup> Department of Radiation Biology, Institute for Cancer Research, The Norwegian Radium Hospital, Oslo University Hospital, 0379 Oslo, Norway; anna.julie.kjol.tornes@rr-research.no (A.J.K.T.); asta.juzeniene@rr-research.no (A.J.)

<sup>2</sup> Nucligen AS, 0379 Oslo, Norway; sciencons@gmail.com

<sup>3</sup> Institute of Clinical Medicine, University of Oslo, 0318 Oslo, Norway; monar@ous-hf.no (M.-E.R.); osb@ous-hf.no (Ø.S.B.)

<sup>4</sup> Department of Pathology, Rikshospitalet, Oslo University Hospital, 0372 Oslo, Norway; hogne.roed.nilsen@rr-research.no

<sup>5</sup> Division of Radiology and Nuclear Medicine, Oslo University Hospital, 0379 Oslo, Norway

<sup>6</sup> Department of Oncology, The Norwegian Radium Hospital, Oslo University Hospital, 0379 Oslo, Norway

\* Correspondence: vilde.stenberg@rr-research.no; Tel.: +47-9012-8434

† These authors contributed equally to this work.

**Table S1.** Clonogenic survival response of PC-3 Flu, C4-2 and PC-3 PIP cells treated with X-ray irradiation (mean  $\pm$  SD,  $n = 3$ ).  $D_0$ , dose required to obtain 37% survival;  $n$ , number of hits per cell; Alpha, alpha-value; Beta, beta-value and SF2, survival fraction at 2 Gy, were brought out from the survival curves fitted to the multitarget model (equation;  $\text{SF} = 1 - (1 - e^{-D/D_0})^n$ ) and the linear-quadratic model (equation;  $\text{SF} = e^{-\alpha D - \beta D^2}$ ). SF, survival fraction; D, dose (Gy).

| Cell line | $D_0$ (Gy)      | $n$             | Alpha ( $\text{Gy}^{-1}$ ) | Beta ( $\text{Gy}^{-2}$ ) | SF2             |
|-----------|-----------------|-----------------|----------------------------|---------------------------|-----------------|
| PC-3 PIP  | $1.21 \pm 0.07$ | $3.86 \pm 1.02$ | $0.33 \pm 0.07$            | $0.14 \pm 0.04$           | $0.30 \pm 0.01$ |
| C4-2      | $1.07 \pm 0.05$ | $2.67 \pm 0.49$ | $0.41 \pm 0.04$            | $0.10 \pm 0.03$           | $0.29 \pm 0.01$ |

**Table S2.** Clonogenic survival response of PC-3 Flu, C4-2 and PC-3 PIP cells treated with  $^{212}\text{Pb}$ -NG001 (mean  $\pm$  SD,  $n = 3$ ). A37, activity required to obtain 37% survival; A50, activity required to obtain 50% survival. A37 and A50 were brought out from the survival curve (Figure 1C) fitted to the single hit model (equation;  $\text{SF} = e^{-A/A_0}$ ).

| Cell line | A37 (kBq/mL) | A50 (kBq/mL) |
|-----------|--------------|--------------|
| PC-3 Flu  | $242 \pm 27$ | $215 \pm 61$ |
| C4-2      | $43 \pm 2$   | $29 \pm 4$   |
| PC-3 PIP  | $22 \pm 1$   | $15 \pm 1$   |

**Table S3.** Percentage of injected activity per gram of tissue (%ID/g  $\pm$  SD) of  $^{212}\text{Pb}$ -NG001 in athymic nude mice with PC-3 PIP ( $n = 5$ –15) or C4-2 xenografts ( $n = 3$ –11). The data for PC-3 PIP xenografts is from the current study, while the data for C4-2 xenografts is from [1].  $n$ , number of mice.

| Organ   | Time point | Xenograft model |          |             |          | <i>p</i> -value |
|---------|------------|-----------------|----------|-------------|----------|-----------------|
|         |            | PC-3 PIP        |          | C4-2        |          |                 |
|         |            | %ID/g ± SD      | <i>n</i> | %ID/g ± SD  | <i>n</i> |                 |
| Tumor   | 1 h        | 30.7 ± 6.4      | 5        | 23.3 ± 8.7  | 3        | 0.209           |
|         | 2 h        | 20.5 ± 5.2      | 15       | 17.6 ± 6.8  | 11       | 0.224           |
|         | 4 h        | 23.2 ± 5.7      | 5        | 13.6 ± 2.1  | 5        | 0.007           |
|         | 24 h       | 13.2 ± 1.7      | 5        | 11.3 ± 3.4  | 3        | 0.346           |
| Kidneys | 1 h        | 50.4 ± 27.8     | 5        | 62.1 ± 7.0  | 3        | 0.517           |
|         | 2 h        | 8.2 ± 3.4       | 15       | 21.1 ± 10.3 | 11       | 0.001           |
|         | 4 h        | 7.0 ± 1.1       | 5        | 9.6 ± 2.5   | 5        | 0.061           |
|         | 24 h       | 3.2 ± 0.6       | 5        | 5.2 ± 0.8   | 3        | 0.095           |

**Table S4.** Statistical significance between PC-3 PIP xenograft groups treated with a single dose or two doses of  $^{212}\text{Pb}$ -NG001. Athymic nude mice received a single dose of 0.2 MBq ( $n = 5$ ), 0.4 MBq ( $n = 8$ ) or 0.8 MBq ( $n = 5$ ), or two doses of 0.2 MBq ( $n = 5$ ) or 0.4 MBq ( $n = 12$ )  $^{212}\text{Pb}$ -NG001. Statistical significance was estimated by a log-rank test with Holm-Sidak pairwise comparison.  $n$ , number of mice.

| Treatment group comparisons               | P-value (single vs. double dose) |
|-------------------------------------------|----------------------------------|
| 1 $\times$ 0.2 MBq vs. 2 $\times$ 0.2 MBq | 0.031                            |
| 1 $\times$ 0.4 MBq vs. 2 $\times$ 0.2 MBq | 0.04                             |
| 1 $\times$ 0.4 MBq vs. 2 $\times$ 0.4 MBq | < 0.001                          |
| 1 $\times$ 0.8 MBq vs. 2 $\times$ 0.4 MBq | 0.016                            |

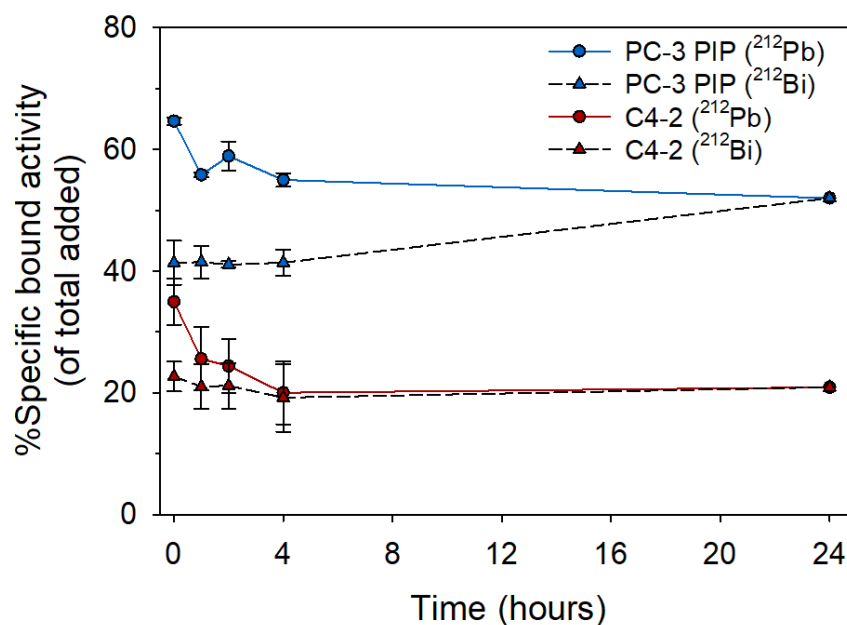

**Figure S1.** Retention of specific cell bound (% of total added activity)  $^{212}\text{Pb}$ - and  $^{212}\text{Bi}$ -labelled NG001 in C4-2 and PC-3 PIP cells after 1, 2, 4 and 24 hours,  $n = 2-3$ . The C4-2 and PC-3 PIP cells were incubated with 30 kBq/mL and 15 kBq/mL of  $^{212}\text{Pb}$ -NG001, respectively, which was the activity reducing survival with 50% (Figure 1C).

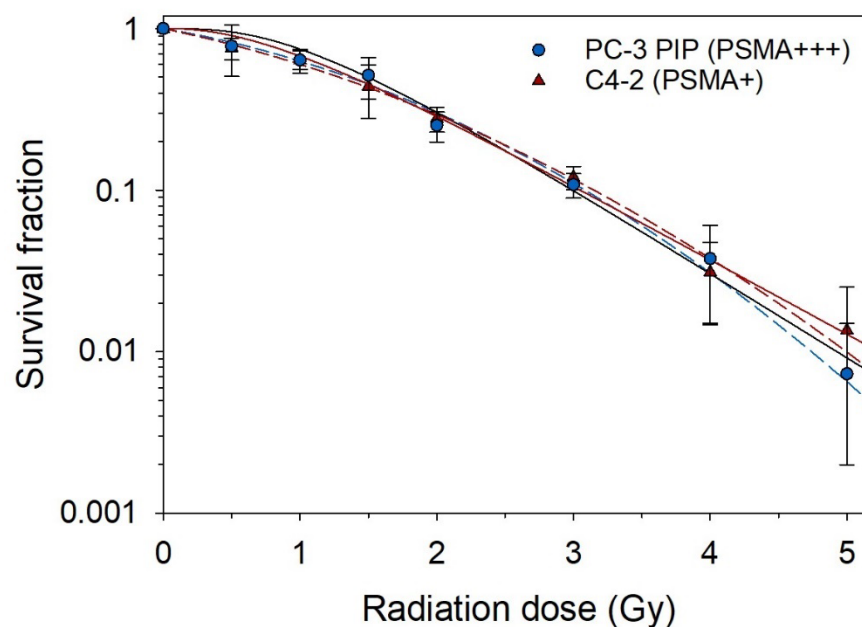

**Figure S2.** Survival fraction of C4-2 and PC-3 PIP cells after treatment with X-ray irradiation (mean  $\pm$  SD,  $n = 3$ ). The survival curves were fitted to the multitarget model (solid line, equation;  $\text{SF} = 1 - (1 - e^{-D/D_0})^n$ ) and the linear-quadratic (dashed line, equation;  $\text{SF} = e^{-\alpha D - \beta D^2}$ ) model. SF, survival fraction; D, dose (Gy);  $D_0$ , dose required to obtain 37% survival;  $n$ , number of hits per cell.

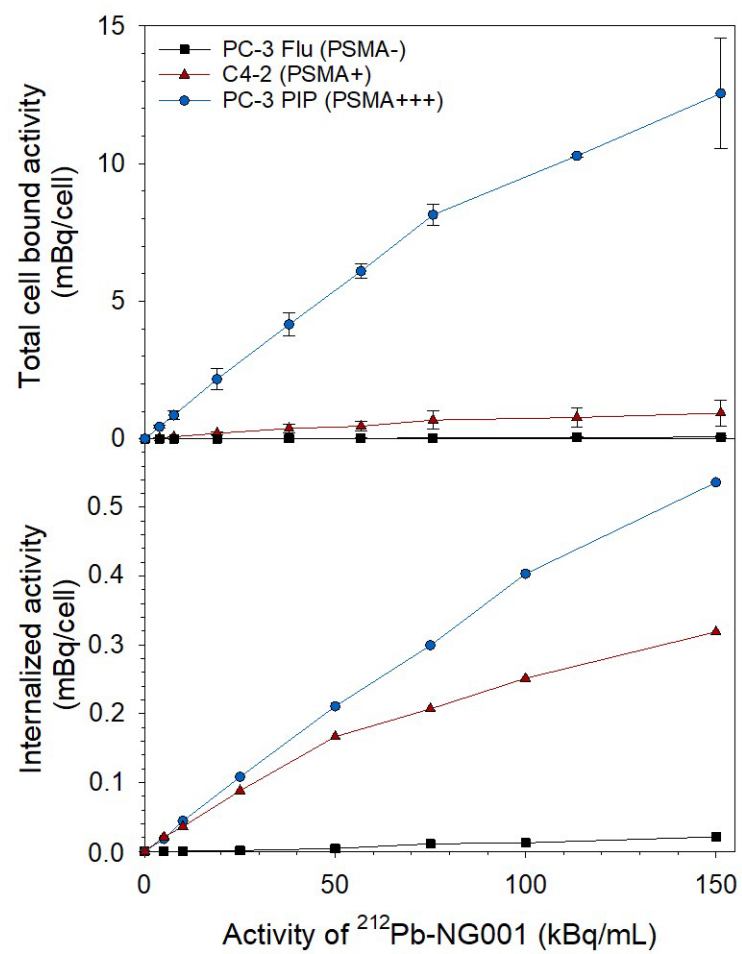

**Figure S3.** Total cell bound (upper) and internalized (lower) activity of  $^{212}\text{Pb-NG001}$  (mBq/cell) in PC-3 Flu, C4-2 and PC-3 PIP cells,  $n = 3$ .

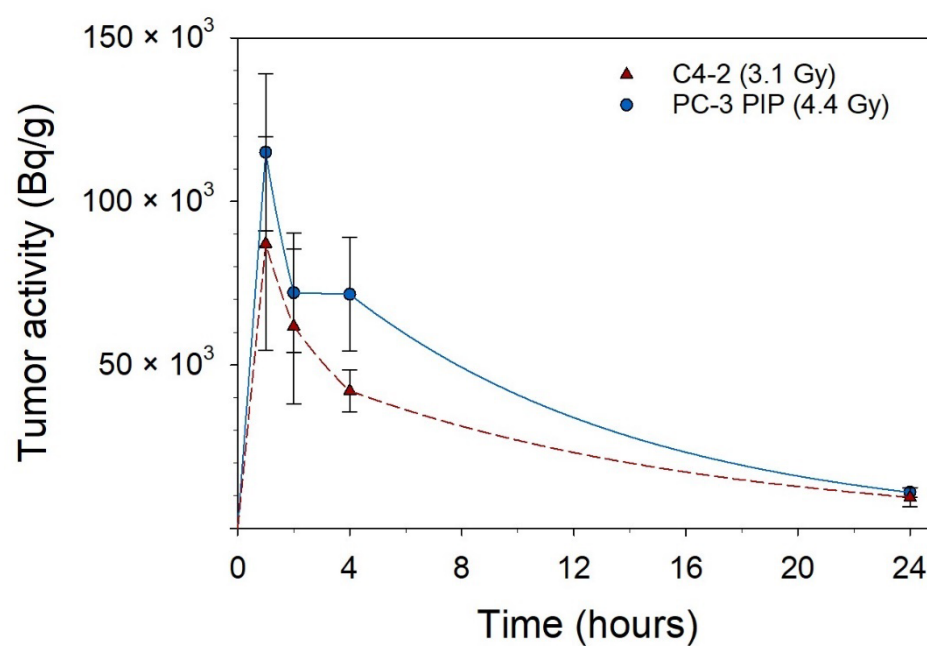

**Figure S4.** Uptake of  $^{212}\text{Pb}$ -NG001 in tumor of athymic nude mice bearing C4-2 or PC-3 PIP xenografts (Bq/g over time),  $n = 3\text{--}15$  mice per time point.

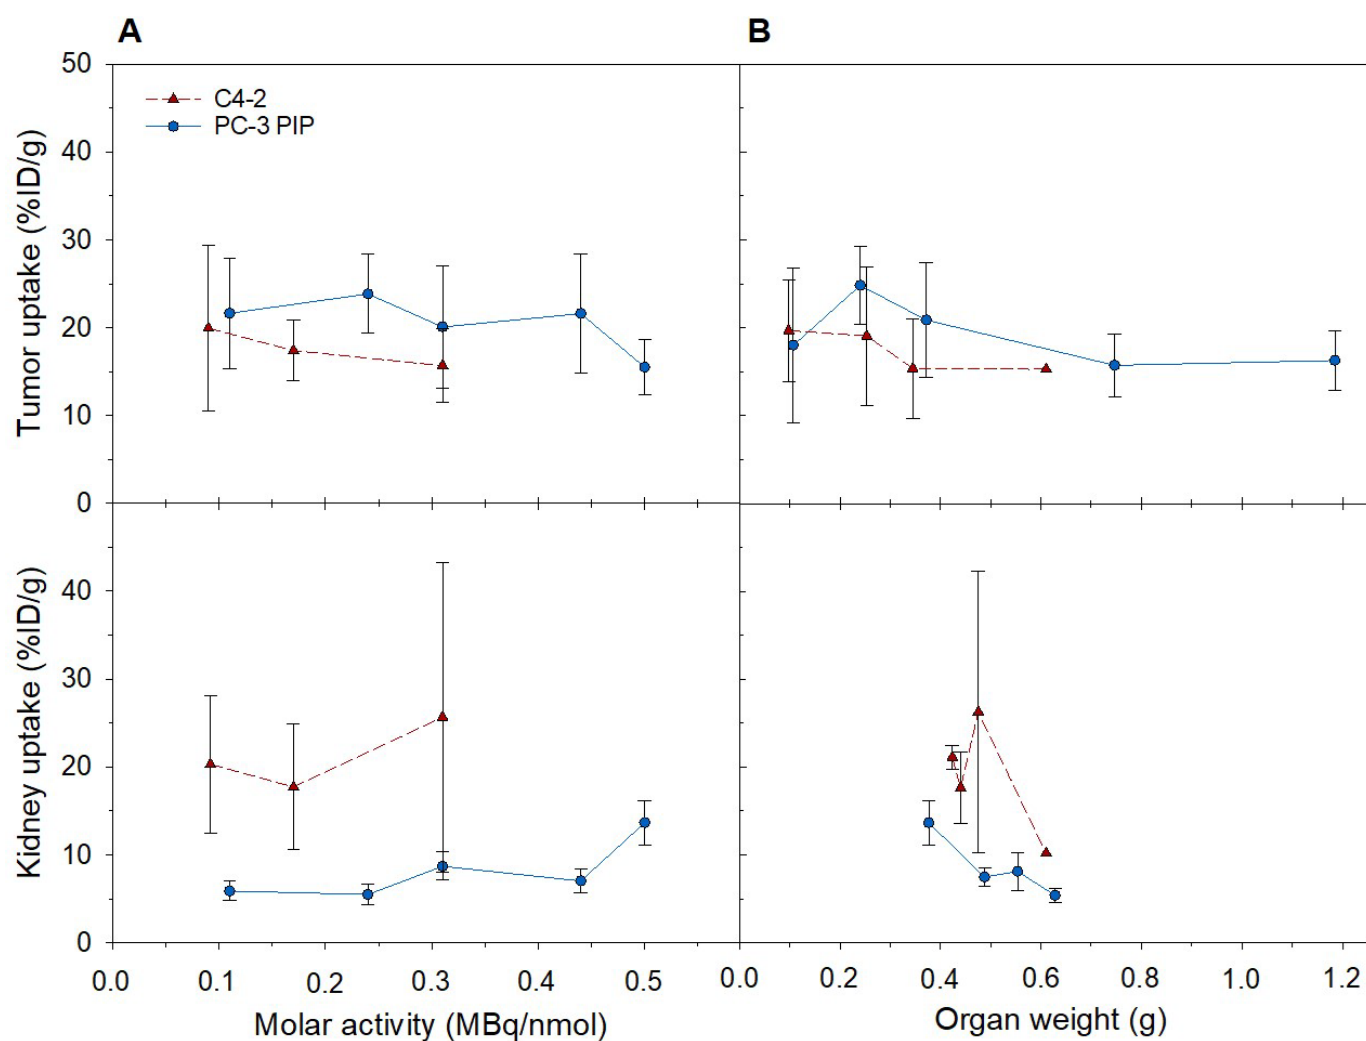

**Figure S5.** Tumor and kidney uptake of  $^{212}\text{Pb}$ -NG001 in nude mice bearing PC-3 PIP or C4-2 xenografts. The uptakes are shown at (A) different effective molar activities (MBq/nmol NG001) and (B) organ weights at 2 hours post injection

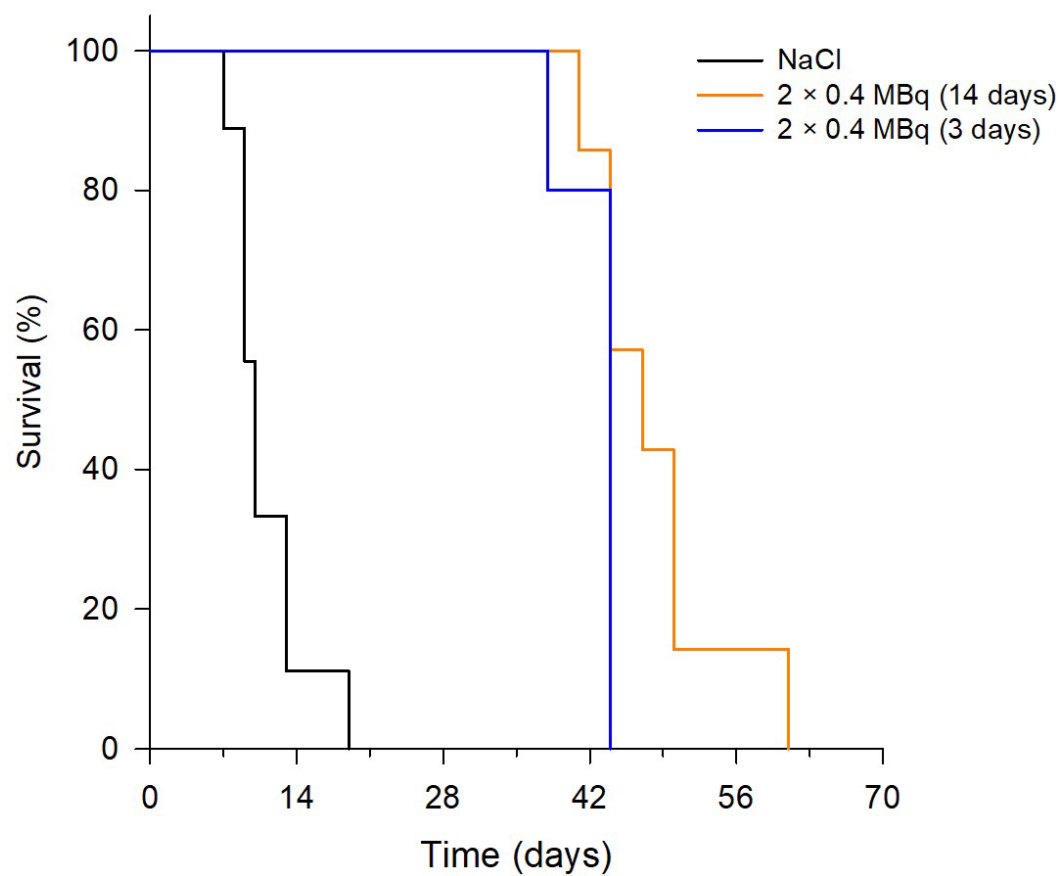

**Figure S6.** Survival analysis of PC-3 PIP bearing nude mice treated with saline ( $n = 9$ ) or  $2 \times 0.4$  MBq of  $^{212}\text{Pb}$ -NG001 with dosing interval of 3 ( $n = 5$ ) or 14 days ( $n = 7$ ). Survival curves were estimated by the Kaplan-Meier method and the curves of the different groups were compared using a log-rank test with multiple pairwise comparisons (Holm-Sidak).  $p > 0.05$ .

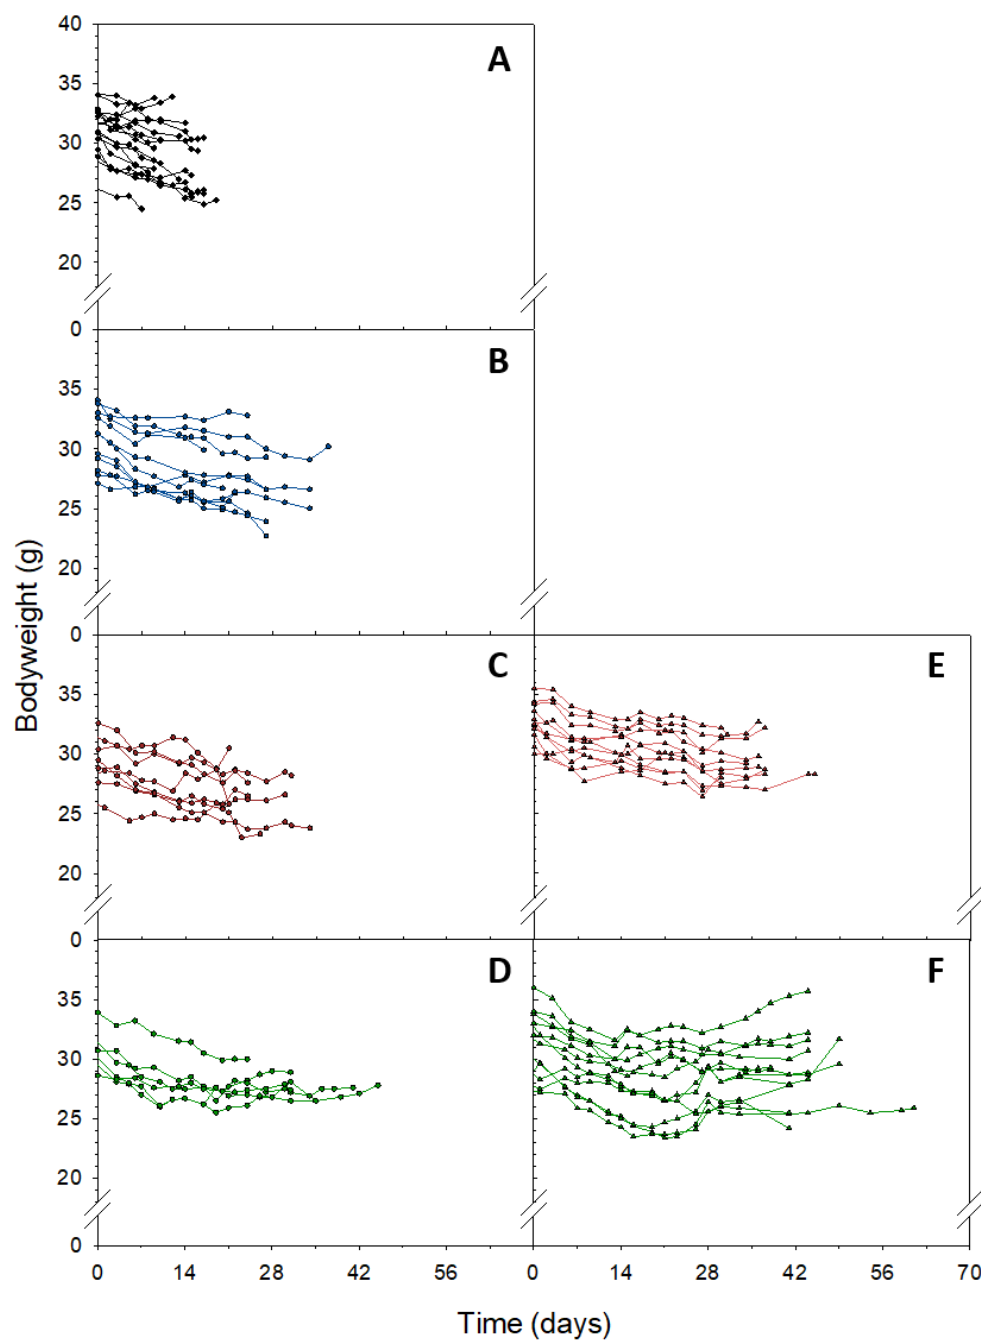

**Figure S7.** Change in body weight of athymic nude mice bearing PC-3 PIP tumors treated with saline or  $^{212}\text{Pb}$ -NG001. The treatment groups received (A) saline ( $n = 9$ ), (B) 0.2 ( $n = 5$ ), (C) 0.4 ( $n = 8$ ), (D) 0.8 ( $n = 5$ ), (E)  $2 \times 0.2$  ( $n = 5$ ), or (F)  $2 \times 0.4$  ( $n = 12$ ) MBq of  $^{212}\text{Pb}$ -NG001.



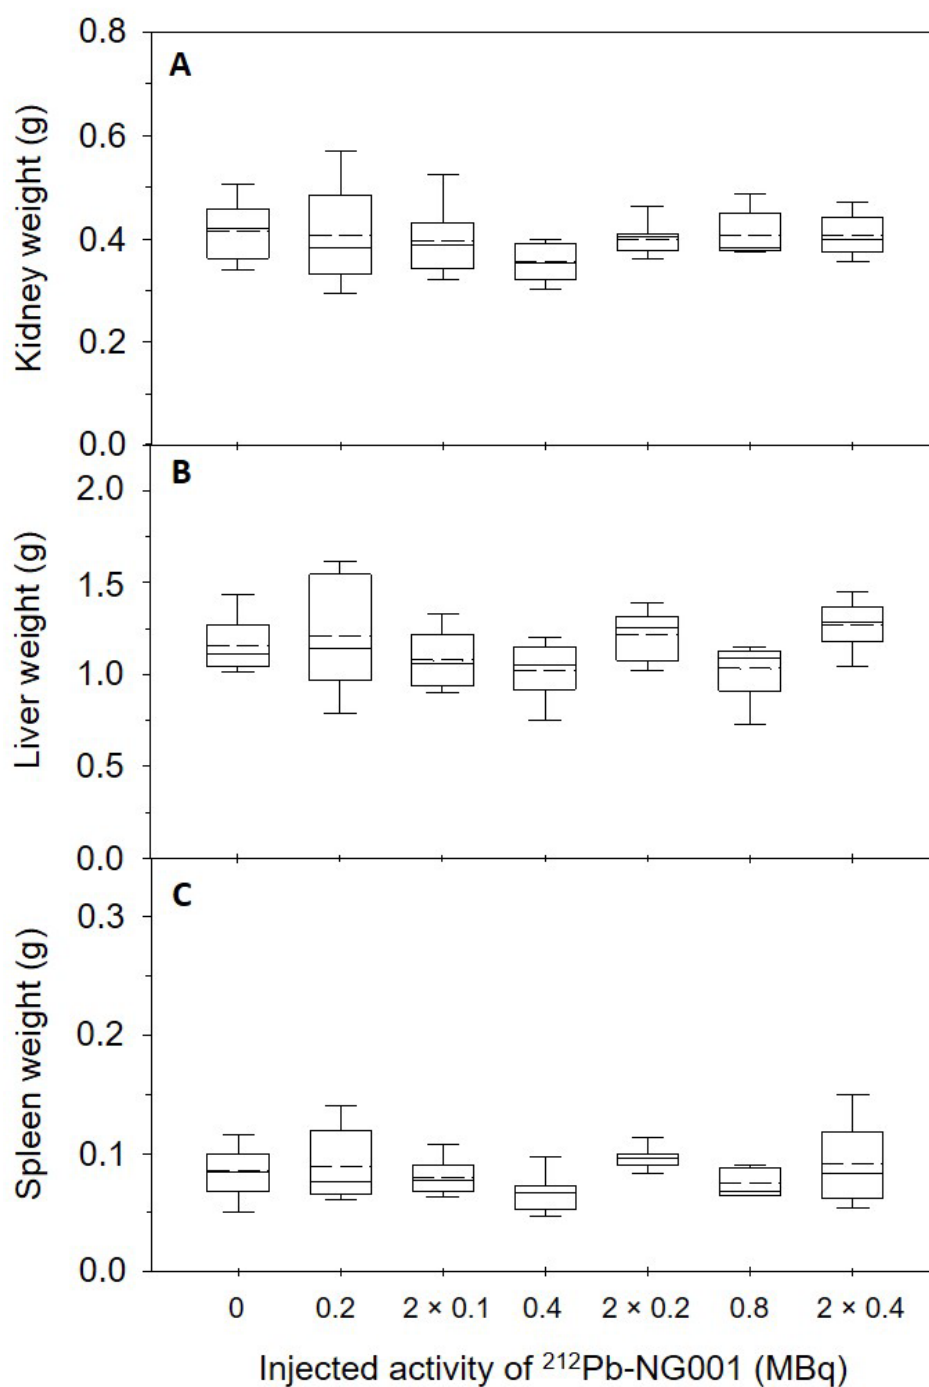

**Figure S8.** Relative weight (%organ weight of body weight) of (A) kidneys, (B) liver and (C) spleen of athymic nude mice with human prostate PC-3 PIP xenografts treated with saline or  $^{212}\text{Pb}$ -NG001. The mice were administered saline ( $n = 9$ ), 0.2 MBq ( $n = 5$ ), 0.4 MBq ( $n = 8$ ), 0.8 MBq ( $n = 5$ ),  $2 \times 0.2$  MBq ( $n = 5$ ) or  $2 \times 0.4$  MBq ( $n = 12$ ) of  $^{212}\text{Pb}$ -NG001. Bottom of the boxes represent the 25<sup>th</sup> percentiles, dashed lines present the means, solid lines represent the medians, top of the boxes represent the 75<sup>th</sup> percentiles and whiskers represent the 5<sup>th</sup> and 95<sup>th</sup> percentiles.

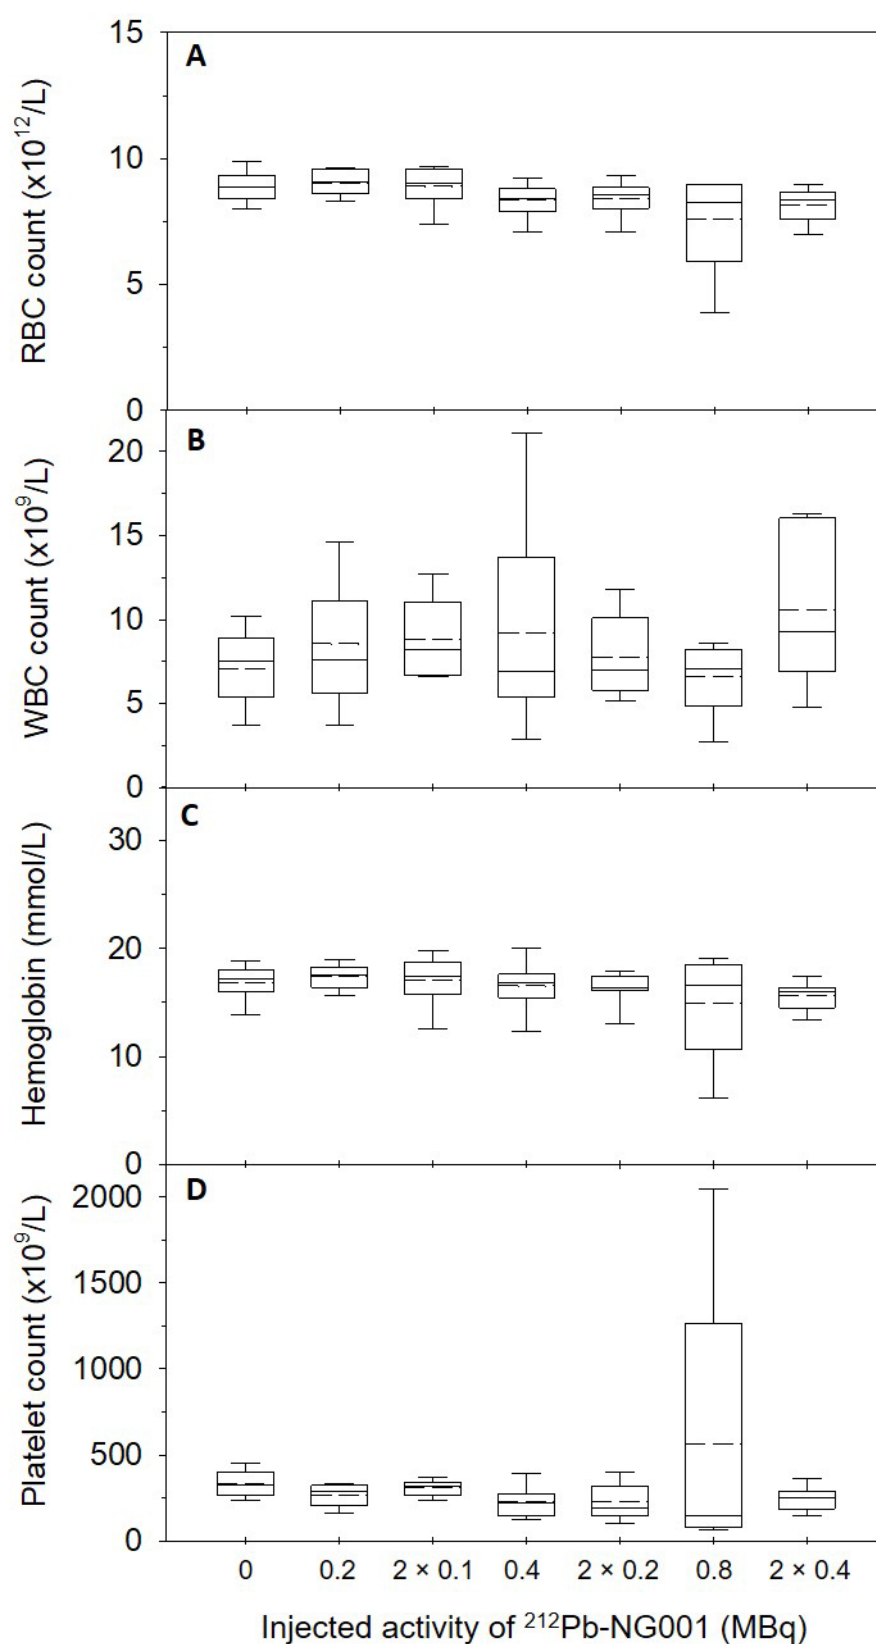

**Figure S9.** Hematological analysis of athymic nude mice with human prostate PC-3 PIP xenografts treated with saline or  $^{212}\text{Pb}$ -NG001. (A) Red blood cell (RBC), (B) white blood cell (WBC), (C) hemoglobin and (D) platelet count of athymic nude mice treated with saline ( $n = 9$ ), 0.2 MBq ( $n = 5$ ), 0.4 MBq ( $n = 8$ ), 0.8 MBq ( $n = 5$ ),  $2 \times 0.2$  MBq ( $n = 5$ ) or  $2 \times 0.4$  MBq ( $n = 12$ ) of  $^{212}\text{Pb}$ -NG001. \* $p < 0.05$ .

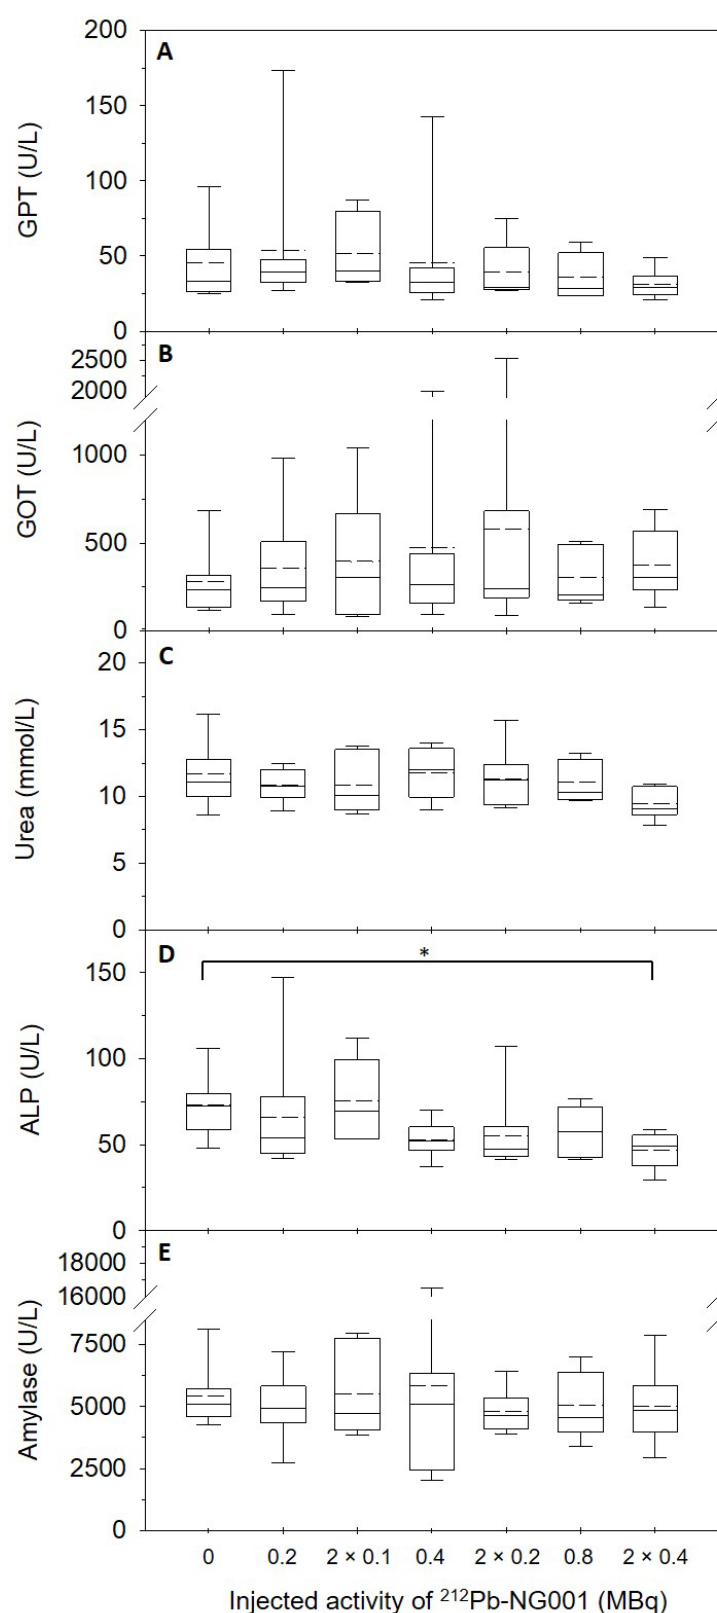

**Figure S10.** Serum parameters of athymic nude mice with human PC-3 PIP xenografts treated with saline or varying doses of  $^{212}\text{Pb}$ -NG001. (A) GPT, (B) GOT, (C) urea, (D) ALP and (E) amylase values of mice treated with saline ( $n = 9$ ), 0.2 MBq ( $n = 5$ ), 0.4 MBq ( $n = 8$ ), 0.8 MBq ( $n = 5$ ),  $2 \times 0.2$  MBq ( $n = 5$ ) or  $2 \times 0.4$  MBq ( $n = 12$ ) of  $^{212}\text{Pb}$ -NG001. Bilirubin  $< 8.55 \mu\text{mol/L}$  and creatinine  $< 44.2 \mu\text{mol/L}$  was measured for all mice, except for one mouse treated with  $2 \times 0.2$  MBq  $^{212}\text{Pb}$ -NG001 with bilirubin of  $9.2 \mu\text{mol/L}$ . GOT, glutamic oxaloacetic transaminase; GPT, glutamic pyruvic transaminase; ALP, alkaline phosphatase. \* $p < 0.05$ .

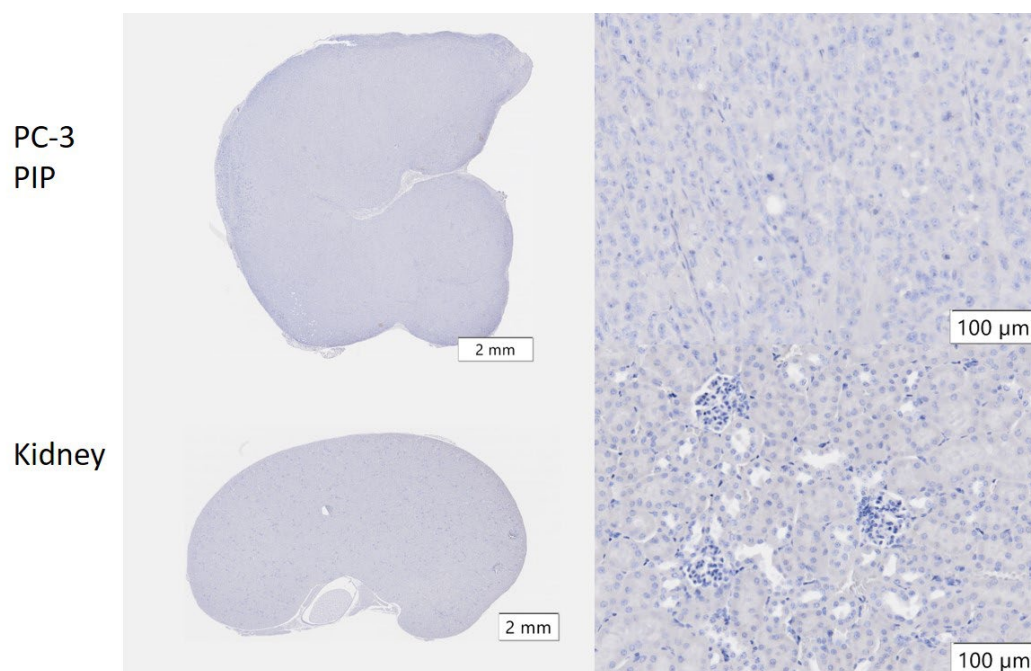

**Figure S11.** Immunohistochemistry (IHC) of PC-3 PIP tumor xenografts and kidneys of athymic nude mice using an isotype control antibody. Representative histological images ( $\times 20$  magnification) were taken using an automatic slide scanner (VS200, Olympus) and analyzed with the VS200 DESKTOP ASW 3.2 software.

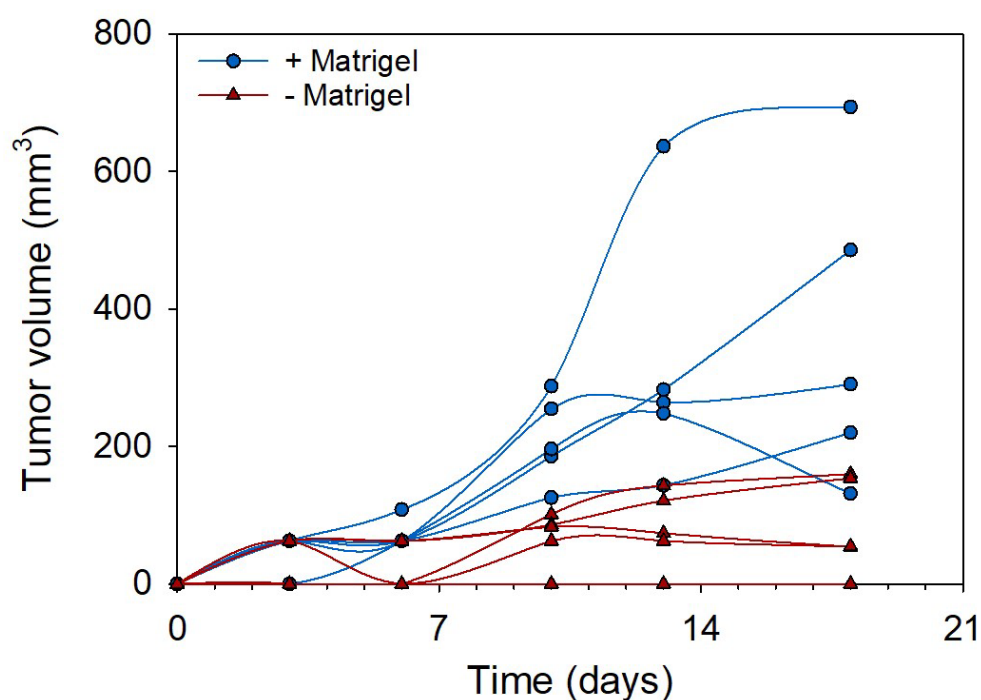

**Figure S12.** Tumor growth of human prostate PC-3 PIP tumors, with or without Matrigel, in athymic nude mice. Before cell inoculation, the tumor cells were resuspended in fresh medium:Matrigel Matrix (1:1) or in fresh medium only.

## References

1. Stenberg, V.Y.; Larsen, R.H.; Ma, L.W.; Peng, Q.; Juzenas, P.; Bruland Ø, S.; Juzeniene, A. Evaluation of the PSMA-Binding Ligand (212)Pb-NG001 in Multicellular Tumour Spheroid and Mouse Models of Prostate Cancer. *Int. J. Mol. Sci.* **2021**, *22*, doi:10.3390/ijms22094815.
